# Supplementary material for: A Vaccine Displaying a Trimeric Influenza-A HA Stem Protein on Capsid-Like Particles Elicits Potent and Long-Lasting Protection in Mice
Source: MDPI journal article supplement (doi:10.3390/vaccines8030389), 2020-07-15
Supplement: s1 [file s1]

## **Supplementary Data**

### **A vaccine displaying a trimeric influenza-A HA stem protein on capsid-like particles elicits potent and long-lasting protection in mice**

Susan Thrane<sup>1</sup>, Kara-Lee Aves<sup>1</sup>, Ida E. M Uddbäck<sup>1</sup>, Christoph M. Janitzek<sup>1</sup>, Julianna Han<sup>2</sup>, Yuhe R. Yang<sup>2</sup>, Andrew B. Ward<sup>2</sup>, Thor G. Theander<sup>1,3</sup>, Morten A. Nielsen<sup>1,3</sup>, Ali Salanti<sup>1,3</sup>, Allan R. Thomsen<sup>1</sup>, Jan P. Christensen<sup>1</sup>, Adam F. Sander<sup>1,3,\*</sup>

<sup>1</sup> Department of Immunology and Microbiology, University of Copenhagen, 2200 Copenhagen, Denmark.

<sup>2</sup> Department of Integrative Structural and Computational Biology, The Scripps Research Institute, La Jolla, CA 92037, USA

<sup>3</sup> AdaptVac Aps, Agern Alle 1, 2970 Hørsholm, Denmark.

\* Correspondence: [asander@sund.ku.dk](mailto:asander@sund.ku.dk)

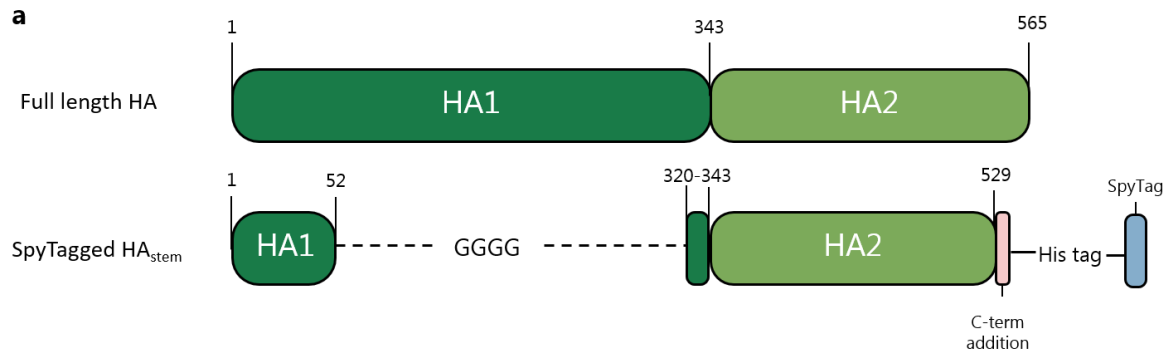

**b**

|                              |                      |                      |                       |
|------------------------------|----------------------|----------------------|-----------------------|
|                              | 1                    | 21                   | 41                    |
| SpyTagged HA <sub>stem</sub> | MKVLLVLLCTFTATYADTI  | CIGYHANNSTDVDTVLEKN  | VTVTHSVNLEN           |
| A/Brisbane/59/2007 (H1N1)    | MKVLLVLLCTFTATYADTI  | CIGYHANNSTDVDTVLEKN  | VTVTHSVNLEN           |
| A/Puerto Rico/8/1934 (H1N1)  | MKANLLVLLCALAADADI   | CIGYHANNSTDVDTVLEKN  | VTVTHSVNLEN           |
|                              | 61                   | 81                   | 101                   |
| SpyTagged HA <sub>stem</sub> | SAKLRMTGLRN          | PSQS                 | QSG                   |
| A/Brisbane/59/2007 (H1N1)    | SAKLRMTGLRN          | PSQS                 | QSG                   |
| A/Puerto Rico/8/1934 (H1N1)  | SAKLRMTGLRN          | PSQS                 | QSG                   |
|                              | 121                  | 141                  | 161                   |
| SpyTagged HA <sub>stem</sub> | QNAINGITNKVNSVIEKMNT | QTAIG                | ENK                   |
| A/Brisbane/59/2007 (H1N1)    | QNAINGITNKVNSVIEKMNT | QTAIG                | ENK                   |
| A/Puerto Rico/8/1934 (H1N1)  | QNAINGITNKVNTVIEKMNI | QTAIG                | ENK                   |
|                              | 181                  | 201                  | 221                   |
| SpyTagged HA <sub>stem</sub> | LENERTLDFHDSNVKNLYEK | VKSQKNNNAKEIGNGCFEFY | HKCNDECMESVKNGTIDYDPK |
| A/Brisbane/59/2007 (H1N1)    | LENERTLDFHDSNVKNLYEK | VKSQKNNNAKEIGNGCFEFY | HKCNDECMESVKNGTIDYDPK |
| A/Puerto Rico/8/1934 (H1N1)  | LENERTLDFHDSNVKNLYEK | VKSQKNNNAKEIGNGCFEFY | HKCNDECMESVKNGTIDYDPK |
|                              | 241                  | 261                  | 281                   |
| SpyTagged HA <sub>stem</sub> | YSEESKLNREKIDGVKLESM | GVYQI                | EGRHHHHHGGAHIV        |
| A/Brisbane/59/2007 (H1N1)    | YSEESKLNREKIDGVKLESM | GVYQI                | -----                 |
| A/Puerto Rico/8/1934 (H1N1)  | YSEESKLNREKIDGVKLESM | GVYQI                | -----                 |

### Supplementary Fig. 1 Sequence comparison of SpyTagged HA<sub>stem</sub> with wild type HA proteins

**a.** Graphical depiction of Spytagged HA<sub>stem</sub> antigen compared to full length A/Brisbane/59/2007 HA.

**b.** Sequence alignment of Spytagged HA<sub>stem</sub> with corresponding amino acid segments from A/Brisbane/59/2007 and A/Puerto Rico/8/1934 H1N1 viral strains. Residues engineered into SpyTagged HA<sub>stem</sub>, which are not present in the A/Brisbane/59/2007 parental protein, are highlighted in green. Non-conserved amino acid residues between the A/Brisbane and A/PR8 strains are colored red. There is a 93% pairwise identity between the A/Brisbane and A/PR8 HA<sub>stem</sub> sequences compared to an 86.5% identity between the full-length HA proteins of the two strains.

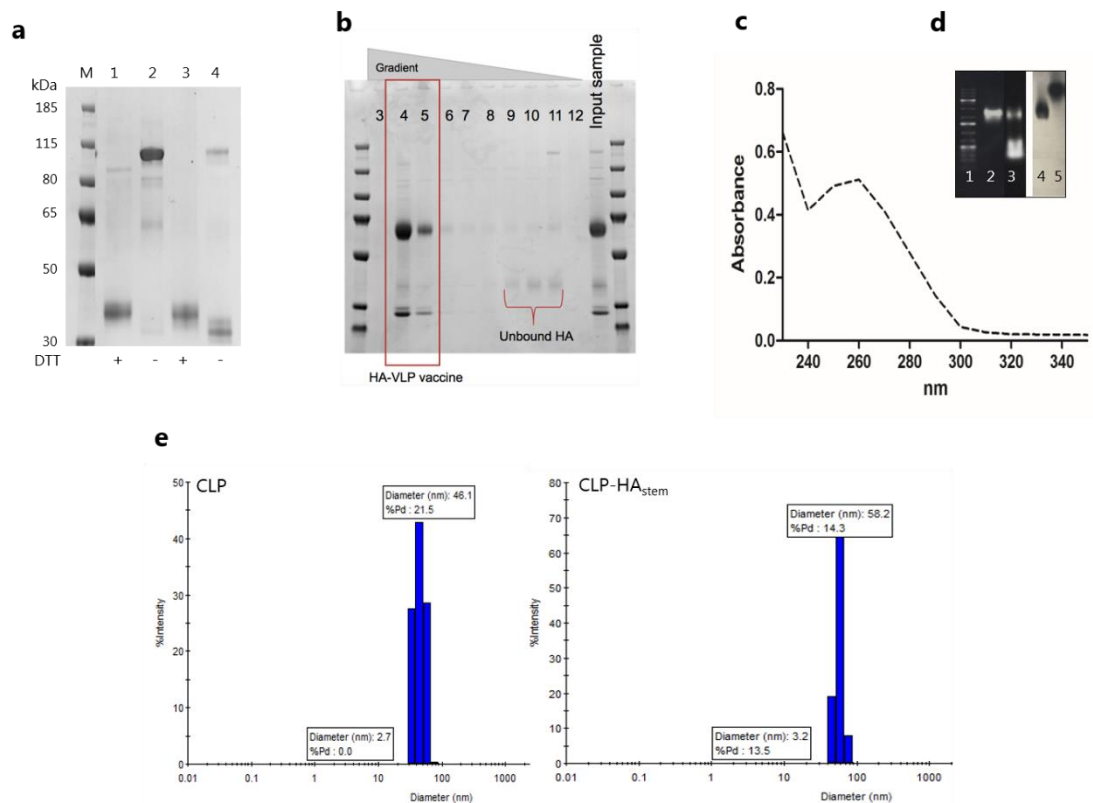

### Supplementary Fig. 2 Characterization of purified HA<sub>stem</sub> and CLP-HA<sub>stem</sub>.

**a** Purification of HA<sub>stem</sub> trimer via immobilized metal affinity chromatography followed by size exclusion chromatography. SDS-PAGE run under reducing (+DTT) and non-reducing (-DTT) conditions, containing a fraction eluted early during gel filtration, and thus containing predominantly trimeric HA<sub>stem</sub> (lane 1 and 2), and a fraction eluted later on, containing predominantly monomeric HA<sub>stem</sub> (lane 3 and 4). **b** Purification of CLP-HA<sub>stem</sub> by density gradient ultracentrifugation. Fraction 3 (high density) to 12 (low density) run on reducing SDS-PAGE alongside input sample taken before ultracentrifugation. Fraction 4 and 5 were pooled and used for the immunization studies. **c** UV spectrum of purified CLP. RNA absorption dominates (260nm). **d** Agarose gel analysis of AP205 CLP. 1kb DNA size marker (lane 1), AP205 CLP input (lane 2 and 4), Urea denatured AP205 CLP (lane 3+5). Left ethidium bromide stained gel, right coomassie stained gel. **e** Dynamic light scattering (DLS) analysis of uncoupled CLP (left) and CLP-HA<sub>stem</sub> vaccine (right).

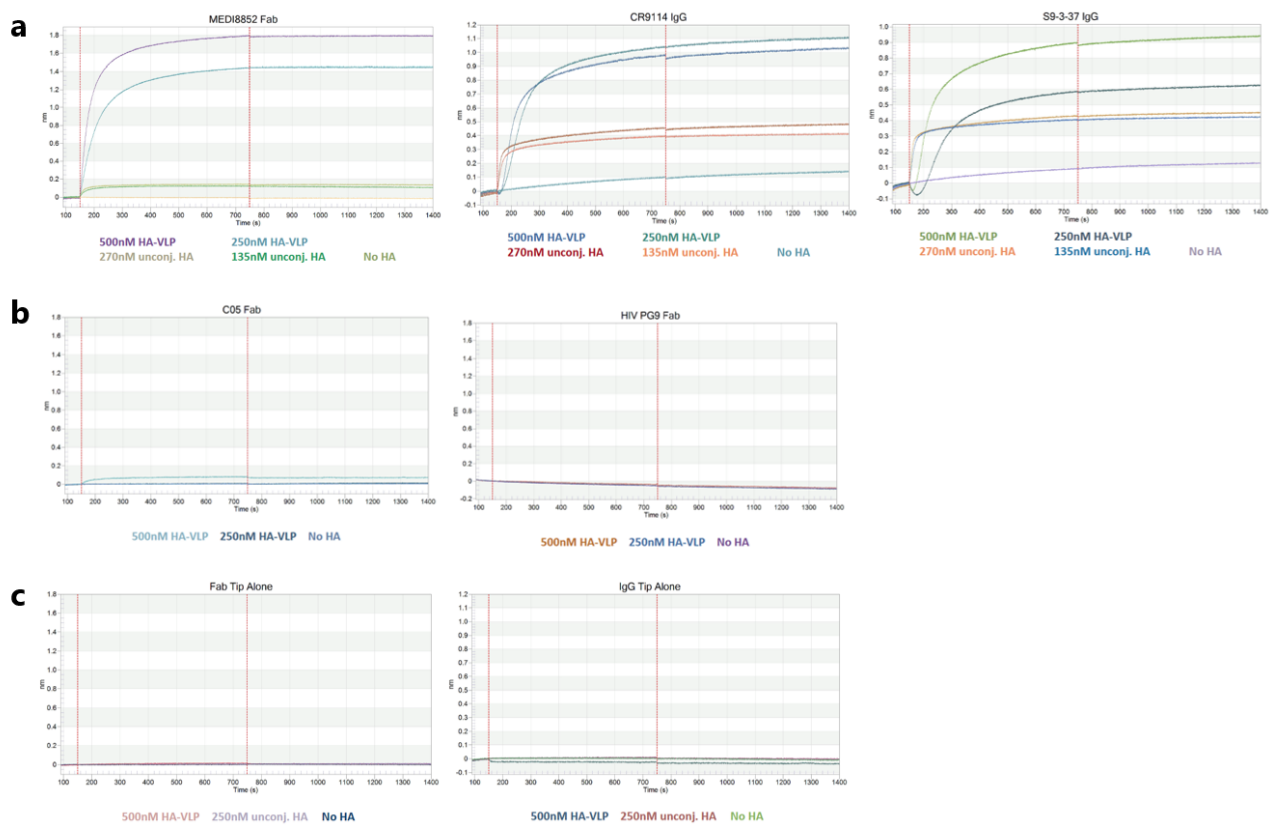

### Supplementary Fig. 3 Binding of bnAb to HA<sub>stem</sub> and CLP-HA<sub>stem</sub>.

Bio-layer interferometry analysis of the binding of **a** MEDI8852 Fab (*left*), CR9114 IgG (*center*) and S9-3-37 IgG (*right*) bnAbs; **b** C05 Fab (HA-head specific) (*right*) and HIV PG9 Fab (HIV specific) (*left*); **c** Fab (*left*) or IgG (*right*) tip alone, to soluble HA<sub>stem</sub> (270mM and 135nM) and CLP-HA<sub>stem</sub> (500nM and 250nM). Each plot is one representative of 3 independently performed experiments.

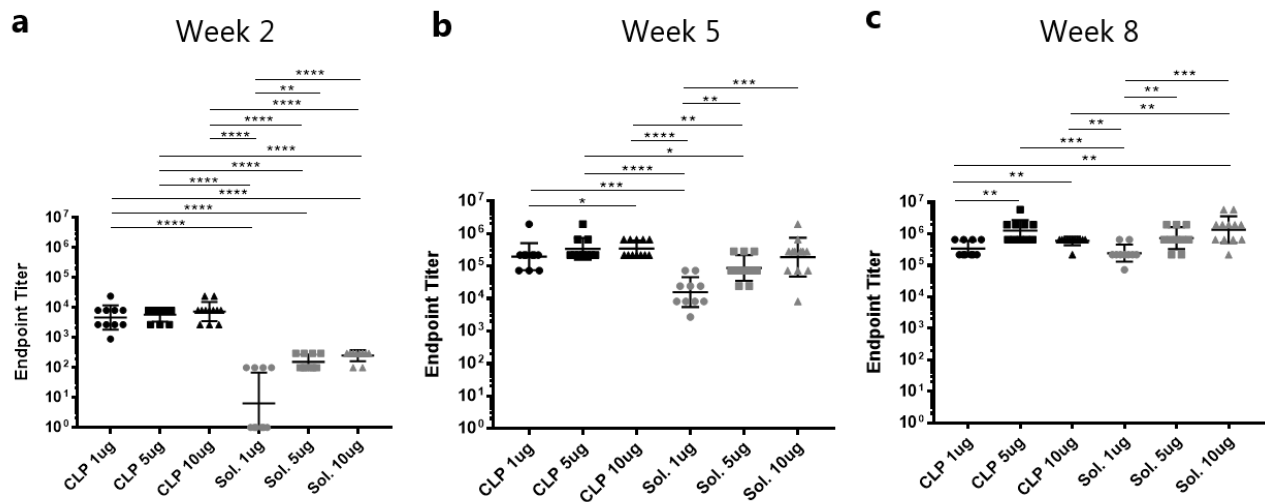

#### Supplementary Fig. 4 HA<sub>stem</sub> specific IgG titres from dose escalation study

ELISA measurements of HA<sub>stem</sub> specific IgG titres from serum taken at **a** Week 2, **b** Week 5 and **c** Week 8. Cut off was set to OD<sub>450nm</sub> of 0.2. Each dot represents one animal. Horizontal lines indicate geometric mean of the group and vertical lines indicate the standard deviation. \*p<0.05; \*\*p<0.005; \*\*\*p<0.0005, \*\*\*\*p>0.00005.
